# Supplementary material
Source: PubMed Central journal article supplement (PMC9588722)
Supplement: NIHMS1839771-supplement-Supplemental_A.pdf [file NIHMS1839771-supplement-Supplemental_A.pdf]

# PROM Dashboard User Survey

Please complete the survey below.

Thank you!

Provider name?

- Dr. Ford  
 Dr. Geiger  
 Dr. Hawkins  
 Dr. Hopkins  
 Dr. Kahn  
 Dr. McChesney  
 Dr. Muldoon

In how many visits today did you see a patient with newly recorded PROM data?

\_\_\_\_\_

In how many visits today did you review the patient's most recent PROM scores?

\_\_\_\_\_

What are some reasons why you didn't review a patient's new PROM scores?

\_\_\_\_\_

In how many visits today did you modify the care plan based on the patient's PROM scores?

\_\_\_\_\_

What are some reasons why you didn't modify a patient's care plan based on their PROM scores?

\_\_\_\_\_

How easy is it to use the PROM dashboard?

- 5 - Extremely easy  
 4  
 3  
 2  
 1- Not at all easy

How useful is the PROM dashboard?

- 5 - Extremely useful  
 4  
 3  
 2  
 1- Not at all useful

How easy is it to find what you're looking for on the PROM dashboard?

- 5 - Extremely easy  
 4  
 3  
 2  
 1- Not at all easy

Sorry to hear that. What have you had difficulty finding?

\_\_\_\_\_

How often are you able to accomplish what you navigated to the PROM dashboard for?

- Every time  
 Most of the time  
 Sometimes  
 Rarely  
 Never

---

How much do you like the look and feel of the PROM dashboard?

- 5 - Love it
- 4
- 3
- 2
- 1- Hate it

---

What would make you use the PROM dashboard more frequently?

---

---

What would make the PROM dashboard easier to use?

---

---

What challenges have you had using the PROM dashboard?

---

---

What do you wish the PROM dashboard could do, but doesn't?

---
